# Supplementary material for: A proteome-wide atlas of lysine-reactive chemistry
Source: Springer Nature journal article supplement (doi:10.1038/s41557-021-00765-4), 2021-09-09
Supplement: 41557_2021_765_MOESM21_ESM.mol [file 41557_2021_765_MOESM21_ESM.mol]

nchem.20092149B-comp4a.mol
  ChemDraw07012115412D

 33 35  0  0  0  0  0  0  0  0999 V2000
    3.2755   -1.0298    0.0000 C   0  0  0  0  0  0  0  0  0  0  0  0
    2.5610   -1.4423    0.0000 C   0  0  0  0  0  0  0  0  0  0  0  0
    1.8466   -1.0298    0.0000 C   0  0  0  0  0  0  0  0  0  0  0  0
    1.1321   -1.4423    0.0000 C   0  0  0  0  0  0  0  0  0  0  0  0
    3.2755   -0.2048    0.0000 O   0  0  0  0  0  0  0  0  0  0  0  0
    3.9900   -1.4423    0.0000 O   0  0  0  0  0  0  0  0  0  0  0  0
    1.1321   -2.2673    0.0000 O   0  0  0  0  0  0  0  0  0  0  0  0
    0.4176   -1.0298    0.0000 C   0  0  0  0  0  0  0  0  0  0  0  0
   -0.2969   -1.4423    0.0000 C   0  0  0  0  0  0  0  0  0  0  0  0
   -1.0113   -1.0298    0.0000 C   0  0  0  0  0  0  0  0  0  0  0  0
   -1.0113   -0.2048    0.0000 C   0  0  0  0  0  0  0  0  0  0  0  0
   -0.2969    0.2077    0.0000 C   0  0  0  0  0  0  0  0  0  0  0  0
    0.4176   -0.2048    0.0000 C   0  0  0  0  0  0  0  0  0  0  0  0
   -1.7258    0.2077    0.0000 O   0  0  0  0  0  0  0  0  0  0  0  0
   -2.4403   -0.2048    0.0000 C   0  0  0  0  0  0  0  0  0  0  0  0
   -3.1547    0.2077    0.0000 C   0  0  0  0  0  0  0  0  0  0  0  0
   -3.1547    1.0327    0.0000 C   0  0  0  0  0  0  0  0  0  0  0  0
   -3.8692    1.4452    0.0000 C   0  0  0  0  0  0  0  0  0  0  0  0
   -4.5837    1.0327    0.0000 C   0  0  0  0  0  0  0  0  0  0  0  0
   -4.5837    0.2077    0.0000 C   0  0  0  0  0  0  0  0  0  0  0  0
   -3.8692   -0.2048    0.0000 C   0  0  0  0  0  0  0  0  0  0  0  0
   -0.2969    1.0327    0.0000 C   0  0  0  0  0  0  0  0  0  0  0  0
   -1.7258   -1.4423    0.0000 C   0  0  0  0  0  0  0  0  0  0  0  0
    5.4581   -1.3654    0.0000 C   0  0  0  0  0  0  0  0  0  0  0  0
    5.6296   -2.1723    0.0000 O   0  0  0  0  0  0  0  0  0  0  0  0
    6.0101   -0.7523    0.0000 C   0  0  0  0  0  0  0  0  0  0  0  0
    5.5976   -0.0378    0.0000 C   0  0  0  0  0  0  0  0  0  0  0  0
    4.7907   -0.2093    0.0000 C   0  0  0  0  0  0  0  0  0  0  0  0
    4.1776    0.3427    0.0000 O   0  0  0  0  0  0  0  0  0  0  0  0
    4.7044   -1.0298    0.0000 N   0  0  0  0  0  0  0  0  0  0  0  0
   -5.2982    1.4452    0.0000 N   0  3  0  0  0  0  0  0  0  0  0  0
   -5.2982    2.2673    0.0000 O   0  0  0  0  0  0  0  0  0  0  0  0
   -6.0101    1.0341    0.0000 O   0  5  0  0  0  0  0  0  0  0  0  0
 31 32  2  0      
 31 33  1  0      
 19 31  1  0      
  1  2  1  0      
  2  3  1  0      
  3  4  1  0      
  1  5  2  0      
  1  6  1  0      
  4  7  2  0      
  8  9  1  0      
  9 10  2  0      
 10 11  1  0      
 11 12  2  0      
 12 13  1  0      
  8 13  2  0      
 15 16  1  0      
 16 17  1  0      
 17 18  2  0      
 18 19  1  0      
 19 20  2  0      
 20 21  1  0      
 16 21  2  0      
 14 15  1  0      
 11 14  1  0      
 12 22  1  0      
 10 23  1  0      
  4  8  1  0      
 24 25  2  0      
 24 26  1  0      
 26 27  1  0      
 27 28  1  0      
 28 29  2  0      
 24 30  1  0      
 28 30  1  0      
  6 30  1  0      
M  CHG  2  31   1  33  -1
M  STY  1   1 SUP
M  SLB  1   1   1
M  SAL   1  3  31  32  33
M  SBL   1  1   3
M  SMT   1 NO2
M  SBV   1   3    0.7145   -0.4125
M  END
