# Supplementary material for: A proteome-wide atlas of lysine-reactive chemistry
Source: Springer Nature journal article supplement (doi:10.1038/s41557-021-00765-4), 2021-09-09
Supplement: 41557_2021_765_MOESM29_ESM.mol [file 41557_2021_765_MOESM29_ESM.mol]

nchem.20092149B-comp5a.mol
  ChemDraw07012115522D

 23 24  0  0  0  0  0  0  0  0999 V2000
   -3.9296    1.0313    0.0000 C   0  0  0  0  0  0  0  0  0  0  0  0
   -3.9296    0.2062    0.0000 C   0  0  0  0  0  0  0  0  0  0  0  0
   -3.2151   -0.2062    0.0000 C   0  0  0  0  0  0  0  0  0  0  0  0
   -2.5006    0.2062    0.0000 C   0  0  0  0  0  0  0  0  0  0  0  0
   -2.5006    1.0313    0.0000 C   0  0  0  0  0  0  0  0  0  0  0  0
   -3.2151    1.4437    0.0000 C   0  0  0  0  0  0  0  0  0  0  0  0
   -1.7862   -0.2062    0.0000 C   0  0  0  0  0  0  0  0  0  0  0  0
   -1.7862   -1.0313    0.0000 C   0  0  0  0  0  0  0  0  0  0  0  0
   -1.0717   -1.4437    0.0000 C   0  0  0  0  0  0  0  0  0  0  0  0
   -0.3572   -1.0313    0.0000 C   0  0  0  0  0  0  0  0  0  0  0  0
   -0.3572   -0.2062    0.0000 C   0  0  0  0  0  0  0  0  0  0  0  0
   -1.0717    0.2062    0.0000 C   0  0  0  0  0  0  0  0  0  0  0  0
    0.3572   -1.4437    0.0000 C   0  0  0  0  0  0  0  0  0  0  0  0
    1.0717   -1.0313    0.0000 C   0  0  0  0  0  0  0  0  0  0  0  0
    1.7862   -1.4437    0.0000 O   0  0  0  0  0  0  0  0  0  0  0  0
    1.0717   -0.2062    0.0000 N   0  3  0  0  0  0  0  0  0  0  0  0
    2.5006   -1.0313    0.0000 C   0  0  0  0  0  0  0  0  0  0  0  0
    3.2151   -1.4437    0.0000 C   0  0  0  0  0  0  0  0  0  0  0  0
    3.9296   -1.0313    0.0000 C   0  0  0  0  0  0  0  0  0  0  0  0
    3.9296   -0.2062    0.0000 C   0  0  0  0  0  0  0  0  0  0  0  0
    3.2151    0.2062    0.0000 C   0  0  0  0  0  0  0  0  0  0  0  0
    2.5006   -0.2062    0.0000 C   0  0  0  0  0  0  0  0  0  0  0  0
    1.7302    0.3589    0.0000 Cl  0  5  0  0  0  0  0  0  0  0  0  0
  1  2  2  0      
  2  3  1  0      
  3  4  2  0      
  4  5  1  0      
  5  6  2  0      
  6  1  1  0      
  4  7  1  0      
  7  8  2  0      
  8  9  1  0      
  9 10  2  0      
 10 11  1  0      
 11 12  2  0      
 12  7  1  0      
 10 13  1  0      
 13 14  1  0      
 14 15  1  0      
 14 16  2  0      
 15 17  1  0      
 17 18  1  0      
 18 19  1  0      
 19 20  1  0      
 20 21  1  0      
 21 22  1  0      
 22 17  1  0      
M  CHG  2  16   1  23  -1
M  END
