# Supplementary material for: A proteome-wide atlas of lysine-reactive chemistry
Source: Springer Nature journal article supplement (doi:10.1038/s41557-021-00765-4), 2021-09-09
Supplement: 41557_2021_765_MOESM31_ESM.mol [file 41557_2021_765_MOESM31_ESM.mol]

nchem.20092149B-comp5b.mol
  ChemDraw07012115512D

 16 17  0  0  0  0  0  0  0  0999 V2000
   -1.7058   -1.8194    0.0000 C   0  0  0  0  0  0  0  0  0  0  0  0
   -0.9042   -1.6246    0.0000 C   0  0  0  0  0  0  0  0  0  0  0  0
   -0.8803   -0.7998    0.0000 C   0  0  0  0  0  0  0  0  0  0  0  0
   -0.4565   -0.0974    0.0000 C   0  0  0  0  0  0  0  0  0  0  0  0
   -1.2582   -0.2922    0.0000 C   0  0  0  0  0  0  0  0  0  0  0  0
   -1.2821   -1.1170    0.0000 C   0  0  0  0  0  0  0  0  0  0  0  0
   -0.1136   -1.8659    0.0000 C   0  0  0  0  0  0  0  0  0  0  0  0
    0.3172   -1.1621    0.0000 C   0  0  0  0  0  0  0  0  0  0  0  0
   -0.4817   -1.3685    0.0000 C   0  0  0  0  0  0  0  0  0  0  0  0
    0.3373   -0.3738    0.0000 C   0  0  0  0  0  0  0  0  0  0  0  0
   -0.4550    0.7266    0.0000 C   0  0  0  0  0  0  0  0  0  0  0  0
    0.2786    1.1041    0.0000 S   0  0  0  0  0  0  0  0  0  0  0  0
   -1.1487    1.1731    0.0000 N   0  3  0  0  0  0  0  0  0  0  0  0
    0.9723    0.6576    0.0000 C   0  0  0  0  0  0  0  0  0  0  0  0
    1.7058    1.0351    0.0000 C   0  0  0  0  0  0  0  0  0  0  0  0
   -0.5315    1.8659    0.0000 Cl  0  5  0  0  0  0  0  0  0  0  0  0
  1  2  1  0      
  3  4  1  0      
  4  5  1  0      
  5  6  1  0      
  6  1  1  0      
  7  8  1  0      
  8  9  1  0      
  6  9  1  0      
  2  7  1  0      
  3  2  1  0      
  8 10  1  0      
  4 10  1  0      
  4 11  1  0      
 11 12  1  0      
 11 13  2  0      
 12 14  1  0      
 14 15  1  0      
M  CHG  2  13   1  16  -1
M  END
