# Supplementary material for: A proteome-wide atlas of lysine-reactive chemistry
Source: Springer Nature journal article supplement (doi:10.1038/s41557-021-00765-4), 2021-09-09
Supplement: 41557_2021_765_MOESM131_ESM.mol [file 41557_2021_765_MOESM131_ESM.mol]

nchem.20092149B-comp17c.mol
  ChemDraw07012115412D

 26 28  0  0  0  0  0  0  0  0999 V2000
    4.1652   -0.8523    0.0000 C   0  0  0  0  0  0  0  0  0  0  0  0
   -2.9614    0.1356    0.0000 C   0  0  0  0  0  0  0  0  0  0  0  0
   -2.9503   -0.6894    0.0000 C   0  0  0  0  0  0  0  0  0  0  0  0
   -2.2304   -1.0923    0.0000 C   0  0  0  0  0  0  0  0  0  0  0  0
   -1.5215   -0.6702    0.0000 C   0  0  0  0  0  0  0  0  0  0  0  0
   -1.5325    0.1547    0.0000 C   0  0  0  0  0  0  0  0  0  0  0  0
   -2.2525    0.5576    0.0000 C   0  0  0  0  0  0  0  0  0  0  0  0
   -3.6592   -1.1114    0.0000 S   0  0  0  0  0  0  0  0  0  0  0  0
   -4.0812   -0.4025    0.0000 O   0  0  0  0  0  0  0  0  0  0  0  0
   -4.3681   -1.5334    0.0000 F   0  0  0  0  0  0  0  0  0  0  0  0
   -3.2371   -1.8203    0.0000 O   0  0  0  0  0  0  0  0  0  0  0  0
   -0.8016   -1.0731    0.0000 C   0  0  0  0  0  0  0  0  0  0  0  0
   -0.7905   -1.8980    0.0000 O   0  0  0  0  0  0  0  0  0  0  0  0
   -0.1157   -0.6146    0.0000 N   0  0  0  0  0  0  0  0  0  0  0  0
    0.6243   -0.9792    0.0000 C   0  0  0  0  0  0  0  0  0  0  0  0
    1.3101   -0.5207    0.0000 C   0  0  0  0  0  0  0  0  0  0  0  0
    2.1901   -1.6984    0.0000 C   0  0  0  0  0  0  0  0  0  0  0  0
    2.0502   -0.8853    0.0000 C   0  0  0  0  0  0  0  0  0  0  0  0
    2.7802   -0.5010    0.0000 C   0  0  0  0  0  0  0  0  0  0  0  0
    3.3713   -1.0765    0.0000 C   0  0  0  0  0  0  0  0  0  0  0  0
    3.0066   -1.8165    0.0000 N   0  0  0  0  0  0  0  0  0  0  0  0
    2.9830    0.2987    0.0000 C   0  0  0  0  0  0  0  0  0  0  0  0
    3.7769    0.5229    0.0000 C   0  0  0  0  0  0  0  0  0  0  0  0
    4.3681   -0.0526    0.0000 C   0  0  0  0  0  0  0  0  0  0  0  0
    3.9798    1.3225    0.0000 O   0  0  0  0  0  0  0  0  0  0  0  0
    3.3887    1.8980    0.0000 C   0  0  0  0  0  0  0  0  0  0  0  0
 25 26  1  0      
 23 25  1  0      
 19 22  1  0      
 22 23  2  0      
  2  3  2  0      
  3  4  1  0      
  4  5  2  0      
  5  6  1  0      
  6  7  2  0      
  7  2  1  0      
  3  8  1  0      
  8  9  2  0      
  8 10  1  0      
  8 11  2  0      
  5 12  1  0      
 12 13  2  0      
 12 14  1  0      
 14 15  1  0      
 15 16  1  0      
 17 18  2  0      
 18 19  1  0      
 19 20  2  0      
 20 21  1  0      
 21 17  1  0      
 23 24  1  0      
 24  1  2  0      
  1 20  1  0      
 16 18  1  0      
M  STY  1   1 SUP
M  SLB  1   1   1
M  SAL   1  2  25  26
M  SBL   1  1   2
M  SMT   1 OMe
M  SBV   1   2   -0.2028   -0.7997
M  END
