# Supplementary material for: A proteome-wide atlas of lysine-reactive chemistry
Source: Springer Nature journal article supplement (doi:10.1038/s41557-021-00765-4), 2021-09-09
Supplement: 41557_2021_765_MOESM149_ESM.mol [file 41557_2021_765_MOESM149_ESM.mol]

nchem.20092149B-comp17l.mol
  ChemDraw07012115412D

 29 31  0  0  0  0  0  0  0  0999 V2000
    1.7800    0.1481    0.0000 N   0  0  0  0  0  0  0  0  0  0  0  0
    1.7800   -0.6798    0.0000 C   0  0  0  0  0  0  0  0  0  0  0  0
    2.4969   -1.0937    0.0000 C   0  0  0  0  0  0  0  0  0  0  0  0
    3.2139   -0.6798    0.0000 C   0  0  0  0  0  0  0  0  0  0  0  0
    3.2139    0.1481    0.0000 C   0  0  0  0  0  0  0  0  0  0  0  0
    2.4969    0.5620    0.0000 N   0  0  0  0  0  0  0  0  0  0  0  0
   -3.9358    0.1481    0.0000 C   0  0  0  0  0  0  0  0  0  0  0  0
   -3.9358   -0.6769    0.0000 C   0  0  0  0  0  0  0  0  0  0  0  0
   -3.2213   -1.0894    0.0000 C   0  0  0  0  0  0  0  0  0  0  0  0
   -2.5069   -0.6769    0.0000 C   0  0  0  0  0  0  0  0  0  0  0  0
   -2.5069    0.1481    0.0000 C   0  0  0  0  0  0  0  0  0  0  0  0
   -3.2213    0.5606    0.0000 C   0  0  0  0  0  0  0  0  0  0  0  0
   -4.6503   -1.0894    0.0000 S   0  0  0  0  0  0  0  0  0  0  0  0
   -5.0628   -0.3749    0.0000 O   0  0  0  0  0  0  0  0  0  0  0  0
   -5.3648   -1.5019    0.0000 F   0  0  0  0  0  0  0  0  0  0  0  0
   -4.2378   -1.8039    0.0000 O   0  0  0  0  0  0  0  0  0  0  0  0
   -1.7924    0.5606    0.0000 N   0  0  0  0  0  0  0  0  0  0  0  0
   -1.0779    0.1481    0.0000 C   0  0  0  0  0  0  0  0  0  0  0  0
   -0.3635    0.5606    0.0000 N   0  0  0  0  0  0  0  0  0  0  0  0
   -1.0779   -0.6769    0.0000 O   0  0  0  0  0  0  0  0  0  0  0  0
    0.3510    0.1481    0.0000 C   0  0  0  0  0  0  0  0  0  0  0  0
    1.0655    0.5606    0.0000 C   0  0  0  0  0  0  0  0  0  0  0  0
    1.0630   -1.0937    0.0000 O   0  0  0  0  0  0  0  0  0  0  0  0
    3.9308    0.5620    0.0000 C   0  0  0  0  0  0  0  0  0  0  0  0
    4.6478    0.1481    0.0000 C   0  0  0  0  0  0  0  0  0  0  0  0
    5.3648    0.5620    0.0000 C   0  0  0  0  0  0  0  0  0  0  0  0
    5.3648    1.3899    0.0000 C   0  0  0  0  0  0  0  0  0  0  0  0
    4.6478    1.8039    0.0000 C   0  0  0  0  0  0  0  0  0  0  0  0
    3.9308    1.3899    0.0000 C   0  0  0  0  0  0  0  0  0  0  0  0
 22  1  1  0      
  1  2  1  0      
  2  3  1  0      
  7  8  2  0      
  8  9  1  0      
  9 10  2  0      
 10 11  1  0      
 11 12  2  0      
 12  7  1  0      
  8 13  1  0      
 13 14  2  0      
 13 15  1  0      
 13 16  2  0      
 11 17  1  0      
 17 18  1  0      
 18 19  1  0      
 18 20  2  0      
 19 21  1  0      
 21 22  1  0      
  3  4  2  0      
  4  5  1  0      
  5  6  2  0      
  6  1  1  0      
  2 23  2  0      
  5 24  1  0      
 24 25  2  0      
 25 26  1  0      
 26 27  2  0      
 27 28  1  0      
 28 29  2  0      
 29 24  1  0      
M  END
