# Supplementary material for: A proteome-wide atlas of lysine-reactive chemistry
Source: Springer Nature journal article supplement (doi:10.1038/s41557-021-00765-4), 2021-09-09
Supplement: 41557_2021_765_MOESM151_ESM.mol [file 41557_2021_765_MOESM151_ESM.mol]

nchem.20092149B-comp17m.mol
  ChemDraw07012115412D

 21 22  0  0  0  0  0  0  0  0999 V2000
    2.1434    1.0865    0.0000 S   0  0  0  0  0  0  0  0  0  0  0  0
    1.7309    1.8010    0.0000 O   0  0  0  0  0  0  0  0  0  0  0  0
    2.8579    1.4990    0.0000 F   0  0  0  0  0  0  0  0  0  0  0  0
    2.5559    0.3720    0.0000 O   0  0  0  0  0  0  0  0  0  0  0  0
    0.7145    1.0865    0.0000 C   0  0  0  0  0  0  0  0  0  0  0  0
    0.0000    0.6740    0.0000 N   0  0  0  0  0  0  0  0  0  0  0  0
    1.4289    0.6740    0.0000 C   0  0  0  0  0  0  0  0  0  0  0  0
   -0.7145    1.0865    0.0000 C   0  0  0  0  0  0  0  0  0  0  0  0
    0.0000   -0.1510    0.0000 C   0  0  0  0  0  0  0  0  0  0  0  0
    0.7145   -0.5635    0.0000 C   0  0  0  0  0  0  0  0  0  0  0  0
   -1.4289    0.6740    0.0000 C   0  0  0  0  0  0  0  0  0  0  0  0
    1.4289   -0.1510    0.0000 C   0  0  0  0  0  0  0  0  0  0  0  0
    2.1434   -0.5635    0.0000 C   0  0  0  0  0  0  0  0  0  0  0  0
    2.1434   -1.3885    0.0000 C   0  0  0  0  0  0  0  0  0  0  0  0
    1.4289   -1.8010    0.0000 C   0  0  0  0  0  0  0  0  0  0  0  0
    0.7145   -1.3885    0.0000 C   0  0  0  0  0  0  0  0  0  0  0  0
   -2.1434    1.0865    0.0000 C   0  0  0  0  0  0  0  0  0  0  0  0
   -2.8579    0.6740    0.0000 C   0  0  0  0  0  0  0  0  0  0  0  0
   -2.8579   -0.1510    0.0000 C   0  0  0  0  0  0  0  0  0  0  0  0
   -2.1434   -0.5635    0.0000 C   0  0  0  0  0  0  0  0  0  0  0  0
   -1.4289   -0.1510    0.0000 C   0  0  0  0  0  0  0  0  0  0  0  0
  6  5  1  0      
  1  2  2  0      
  1  3  1  0      
  1  4  2  0      
  5  7  1  0      
  7  1  1  0      
  6  8  1  0      
  6  9  1  0      
  9 10  1  0      
  8 11  1  0      
 10 12  2  0      
 12 13  1  0      
 13 14  2  0      
 14 15  1  0      
 15 16  2  0      
 16 10  1  0      
 11 17  2  0      
 17 18  1  0      
 18 19  2  0      
 19 20  1  0      
 20 21  2  0      
 21 11  1  0      
M  END
