# Supplementary material for: A proteome-wide atlas of lysine-reactive chemistry
Source: Springer Nature journal article supplement (doi:10.1038/s41557-021-00765-4), 2021-09-09
Supplement: 41557_2021_765_MOESM159_ESM.mol [file 41557_2021_765_MOESM159_ESM.mol]

nchem.20092149B-comp17q.mol
  ChemDraw07012115412D

 16 17  0  0  0  0  0  0  0  0999 V2000
    1.7862    1.0865    0.0000 S   0  0  0  0  0  0  0  0  0  0  0  0
    2.1987    0.3720    0.0000 O   0  0  0  0  0  0  0  0  0  0  0  0
    2.5006    1.4990    0.0000 F   0  0  0  0  0  0  0  0  0  0  0  0
    1.3737    1.8010    0.0000 O   0  0  0  0  0  0  0  0  0  0  0  0
    1.0717   -0.1510    0.0000 C   0  0  0  0  0  0  0  0  0  0  0  0
    1.0717    0.6740    0.0000 C   0  0  0  0  0  0  0  0  0  0  0  0
    0.3572    1.0865    0.0000 C   0  0  0  0  0  0  0  0  0  0  0  0
   -0.3572    0.6740    0.0000 C   0  0  0  0  0  0  0  0  0  0  0  0
   -0.3572   -0.1510    0.0000 C   0  0  0  0  0  0  0  0  0  0  0  0
    0.3572   -0.5635    0.0000 C   0  0  0  0  0  0  0  0  0  0  0  0
   -1.0717   -0.5635    0.0000 C   0  0  0  0  0  0  0  0  0  0  0  0
   -1.7862   -0.1510    0.0000 C   0  0  0  0  0  0  0  0  0  0  0  0
   -2.5006   -0.5635    0.0000 C   0  0  0  0  0  0  0  0  0  0  0  0
   -2.5006   -1.3885    0.0000 C   0  0  0  0  0  0  0  0  0  0  0  0
   -1.7862   -1.8010    0.0000 C   0  0  0  0  0  0  0  0  0  0  0  0
   -1.0717   -1.3885    0.0000 C   0  0  0  0  0  0  0  0  0  0  0  0
 10  5  1  0      
  6  1  1  0      
  1  2  2  0      
  1  3  1  0      
  1  4  2  0      
  5  6  2  0      
  6  7  1  0      
  7  8  2  0      
  8  9  1  0      
  9 10  2  0      
  9 11  1  0      
 11 12  2  0      
 12 13  1  0      
 13 14  2  0      
 14 15  1  0      
 15 16  2  0      
 16 11  1  0      
M  END
