# Supplementary material for: A proteome-wide atlas of lysine-reactive chemistry
Source: Springer Nature journal article supplement (doi:10.1038/s41557-021-00765-4), 2021-09-09
Supplement: 41557_2021_765_MOESM161_ESM.mol [file 41557_2021_765_MOESM161_ESM.mol]

nchem.20092149B-comp17r.mol
  ChemDraw07012115412D

 36 40  0  0  0  0  0  0  0  0999 V2000
   -4.1664   -2.0612    0.0000 C   0  0  0  0  0  0  0  0  0  0  0  0
   -4.1694   -1.2362    0.0000 C   0  0  0  0  0  0  0  0  0  0  0  0
   -3.4564   -0.8211    0.0000 C   0  0  0  0  0  0  0  0  0  0  0  0
   -2.7404   -1.2310    0.0000 C   0  0  0  0  0  0  0  0  0  0  0  0
   -2.7374   -2.0560    0.0000 C   0  0  0  0  0  0  0  0  0  0  0  0
   -3.4534   -2.4659    0.0000 C   0  0  0  0  0  0  0  0  0  0  0  0
   -4.8838   -0.8237    0.0000 S   0  0  0  0  0  0  0  0  0  0  0  0
   -5.2963   -1.5382    0.0000 O   0  0  0  0  0  0  0  0  0  0  0  0
   -5.5983   -0.4112    0.0000 F   0  0  0  0  0  0  0  0  0  0  0  0
   -4.4713   -0.1092    0.0000 O   0  0  0  0  0  0  0  0  0  0  0  0
   -2.0230   -2.4685    0.0000 C   0  0  0  0  0  0  0  0  0  0  0  0
   -1.3085   -2.0560    0.0000 N   0  0  0  0  0  0  0  0  0  0  0  0
   -0.5955   -2.4711    0.0000 C   0  0  0  0  0  0  0  0  0  0  0  0
    0.1204   -2.0612    0.0000 C   0  0  0  0  0  0  0  0  0  0  0  0
    0.1234   -1.2362    0.0000 N   0  0  0  0  0  0  0  0  0  0  0  0
   -0.5925   -0.8263    0.0000 C   0  0  0  0  0  0  0  0  0  0  0  0
   -1.3055   -1.2310    0.0000 C   0  0  0  0  0  0  0  0  0  0  0  0
    0.8379   -0.8237    0.0000 C   0  0  0  0  0  0  0  0  0  0  0  0
    0.8439    0.0013    0.0000 N   0  0  0  0  0  0  0  0  0  0  0  0
    1.5614    0.4086    0.0000 C   0  0  0  0  0  0  0  0  0  0  0  0
    2.2728   -0.0091    0.0000 C   0  0  0  0  0  0  0  0  0  0  0  0
    2.2668   -0.8341    0.0000 C   0  0  0  0  0  0  0  0  0  0  0  0
    1.5524   -1.2362    0.0000 N   0  0  0  0  0  0  0  0  0  0  0  0
    1.5614    1.2336    0.0000 C   0  0  0  0  0  0  0  0  0  0  0  0
    2.9813   -1.2466    0.0000 N   0  0  0  0  0  0  0  0  0  0  0  0
    2.2758    1.6461    0.0000 O   0  0  0  0  0  0  0  0  0  0  0  0
    0.8469    1.6461    0.0000 N   0  0  0  0  0  0  0  0  0  0  0  0
    0.8469    2.4711    0.0000 C   0  0  0  0  0  0  0  0  0  0  0  0
    3.6958   -0.8341    0.0000 C   0  0  0  0  0  0  0  0  0  0  0  0
    4.4507   -1.1669    0.0000 N   0  0  0  0  0  0  0  0  0  0  0  0
    5.0025   -0.5613    0.0000 N   0  0  0  0  0  0  0  0  0  0  0  0
    4.5926    0.1547    0.0000 C   0  0  0  0  0  0  0  0  0  0  0  0
    3.7850   -0.0139    0.0000 C   0  0  0  0  0  0  0  0  0  0  0  0
    4.9309    0.9071    0.0000 C   0  0  0  0  0  0  0  0  0  0  0  0
    5.5983    1.3920    0.0000 C   0  0  0  0  0  0  0  0  0  0  0  0
    4.8506    1.7282    0.0000 C   0  0  0  0  0  0  0  0  0  0  0  0
  1  2  2  0      
  2  3  1  0      
  3  4  2  0      
  4  5  1  0      
  5  6  2  0      
  6  1  1  0      
  2  7  1  0      
  7  8  2  0      
  7  9  1  0      
  7 10  2  0      
  5 11  1  0      
 11 12  1  0      
 12 13  1  0      
 13 14  1  0      
 14 15  1  0      
 15 16  1  0      
 16 17  1  0      
 17 12  1  0      
 15 18  1  0      
 18 19  2  0      
 19 20  1  0      
 20 21  2  0      
 21 22  1  0      
 22 23  2  0      
 23 18  1  0      
 20 24  1  0      
 22 25  1  0      
 24 26  2  0      
 24 27  1  0      
 27 28  1  0      
 25 29  1  0      
 29 30  2  0      
 30 31  1  0      
 31 32  1  0      
 32 33  2  0      
 33 29  1  0      
 32 34  1  0      
 34 35  1  0      
 35 36  1  0      
 36 34  1  0      
M  END
