# Supplementary material for: A proteome-wide atlas of lysine-reactive chemistry
Source: Springer Nature journal article supplement (doi:10.1038/s41557-021-00765-4), 2021-09-09
Supplement: 41557_2021_765_MOESM185_ESM.mol [file 41557_2021_765_MOESM185_ESM.mol]

nchem.20092149B-comp19g.mol
  ChemDraw07012115422D

 21 23  0  0  1  0  0  0  0  0999 V2000
   -0.7697   -1.0313    0.0000 C   0  0  0  0  0  0  0  0  0  0  0  0
   -0.7697   -1.8563    0.0000 C   0  0  0  0  0  0  0  0  0  0  0  0
   -0.0553   -2.2688    0.0000 C   0  0  0  0  0  0  0  0  0  0  0  0
    0.6592   -1.8563    0.0000 C   0  0  0  0  0  0  0  0  0  0  0  0
    0.6592   -1.0313    0.0000 C   0  0  0  0  0  0  0  0  0  0  0  0
   -0.0553   -0.6188    0.0000 C   0  0  0  0  0  0  0  0  0  0  0  0
   -1.4842   -0.6188    0.0000 C   0  0  0  0  0  0  0  0  0  0  0  0
   -2.1987   -1.0313    0.0000 C   0  0  0  0  0  0  0  0  0  0  0  0
   -2.1987   -1.8563    0.0000 C   0  0  0  0  0  0  0  0  0  0  0  0
   -1.4842   -2.2688    0.0000 N   0  0  0  0  0  0  0  0  0  0  0  0
   -2.9131   -2.2688    0.0000 O   0  0  0  0  0  0  0  0  0  0  0  0
    1.3737   -0.6188    0.0000 C   0  0  0  0  0  0  0  0  0  0  0  0
    2.0881   -1.0313    0.0000 O   0  0  0  0  0  0  0  0  0  0  0  0
    2.8026   -0.6188    0.0000 C   0  0  0  0  0  0  0  0  0  0  0  0
    2.8026    0.2062    0.0000 C   0  0  0  0  0  0  0  0  0  0  0  0
    2.0881    0.6187    0.0000 N   0  0  0  0  0  0  0  0  0  0  0  0
    1.3737    0.2062    0.0000 C   0  0  0  0  0  0  0  0  0  0  0  0
    2.0881    1.4437    0.0000 S   0  0  0  0  0  0  0  0  0  0  0  0
    1.2631    1.4437    0.0000 O   0  0  0  0  0  0  0  0  0  0  0  0
    2.9131    1.4437    0.0000 O   0  0  0  0  0  0  0  0  0  0  0  0
    2.0881    2.2688    0.0000 F   0  0  0  0  0  0  0  0  0  0  0  0
  1  2  2  0      
  2  3  1  0      
  3  4  2  0      
  4  5  1  0      
  5  6  2  0      
  6  1  1  0      
  1  7  1  0      
  7  8  1  0      
  8  9  1  0      
  9 10  1  0      
 10  2  1  0      
  9 11  2  0      
 12  5  1  6      
 12 13  1  0      
 13 14  1  0      
 14 15  1  0      
 15 16  1  0      
 16 17  1  0      
 17 12  1  0      
 16 18  1  0      
 18 19  2  0      
 18 20  2  0      
 18 21  1  0      
M  END
