# Supplementary material for: A proteome-wide atlas of lysine-reactive chemistry
Source: Springer Nature journal article supplement (doi:10.1038/s41557-021-00765-4), 2021-09-09
Supplement: 41557_2021_765_MOESM207_ESM.mol [file 41557_2021_765_MOESM207_ESM.mol]

nchem.20092149B-comp22b.mol
  ChemDraw07012115412D

 24 25  0  0  1  0  0  0  0  0999 V2000
   -1.3866    0.6249    0.0000 O   0  0  0  0  0  0  0  0  0  0  0  0
   -0.6688    1.0279    0.0000 C   0  0  0  0  0  0  0  0  0  0  0  0
   -0.6589    1.8511    0.0000 O   0  0  0  0  0  0  0  0  0  0  0  0
    0.0392    0.6078    0.0000 N   0  5  0  0  0  0  0  0  0  0  0  0
    0.7570    1.0108    0.0000 S   0  0  0  0  0  0  0  0  0  0  0  0
    1.4222    0.5899    0.0000 N   0  0  0  0  0  0  0  0  0  0  0  0
    1.3689    1.5615    0.0000 O   0  0  0  0  0  0  0  0  0  0  0  0
    0.2063    1.6228    0.0000 O   0  0  0  0  0  0  0  0  0  0  0  0
   -1.3965   -0.1983    0.0000 C   0  0  0  0  0  0  0  0  0  0  0  0
    1.5013   -0.2324    0.0000 C   0  0  0  0  0  0  0  0  0  0  0  0
    2.3078   -0.4112    0.0000 C   0  0  0  0  0  0  0  0  0  0  0  0
    2.7272    0.3005    0.0000 N   0  3  0  0  0  0  0  0  0  0  0  0
    2.1798    0.9193    0.0000 C   0  0  0  0  0  0  0  0  0  0  0  0
    3.5495    0.3796    0.0000 C   0  0  0  0  0  0  0  0  0  0  0  0
   -2.1180   -0.6120    0.0000 C   0  0  0  0  0  0  0  0  0  0  0  0
   -2.8340   -0.2000    0.0000 C   0  0  0  0  0  0  0  0  0  0  0  0
   -3.5495   -0.6131    0.0000 C   0  0  0  0  0  0  0  0  0  0  0  0
   -3.5488   -1.4380    0.0000 C   0  0  0  0  0  0  0  0  0  0  0  0
   -2.8347   -1.8511    0.0000 C   0  0  0  0  0  0  0  0  0  0  0  0
   -2.1193   -1.4380    0.0000 C   0  0  0  0  0  0  0  0  0  0  0  0
   -0.6737   -0.6099    0.0000 C   0  0  0  0  0  0  0  0  0  0  0  0
   -1.0811   -1.3252    0.0000 F   0  0  0  0  0  0  0  0  0  0  0  0
    0.0416   -1.0172    0.0000 F   0  0  0  0  0  0  0  0  0  0  0  0
   -0.2663    0.1055    0.0000 F   0  0  0  0  0  0  0  0  0  0  0  0
 21 22  1  0      
 21 23  1  0      
 21 24  1  0      
  9 21  1  1      
  1  2  1  0      
  2  3  2  0      
  2  4  1  0      
  4  5  1  0      
  5  6  1  0      
  5  7  2  0      
  5  8  2  0      
  1  9  1  0      
  6 10  1  0      
 10 11  2  0      
 11 12  1  0      
 12 13  2  0      
 13  6  1  0      
 12 14  1  0      
  9 15  1  0      
 15 16  2  0      
 16 17  1  0      
 17 18  2  0      
 18 19  1  0      
 19 20  2  0      
 20 15  1  0      
M  CHG  2   4  -1  12   1
M  STY  1   1 SUP
M  SLB  1   1   1
M  SAL   1  4  21  22  23  24
M  SBL   1  1   4
M  SMT   1 CF3
M  SBV   1   4   -0.7227    0.4116
M  END
