# Supplementary material for: A proteome-wide atlas of lysine-reactive chemistry
Source: Springer Nature journal article supplement (doi:10.1038/s41557-021-00765-4), 2021-09-09
Supplement: 41557_2021_765_MOESM271_ESM.mol [file 41557_2021_765_MOESM271_ESM.mol]

nchem.20092149B-comp27d.mol
  ChemDraw07012115412D

 16 17  0  0  0  0  0  0  0  0999 V2000
   -0.7145    0.4125    0.0000 C   0  0  0  0  0  0  0  0  0  0  0  0
   -0.7145   -0.4125    0.0000 C   0  0  0  0  0  0  0  0  0  0  0  0
    0.0000   -0.8250    0.0000 C   0  0  0  0  0  0  0  0  0  0  0  0
    0.7145   -0.4125    0.0000 C   0  0  0  0  0  0  0  0  0  0  0  0
    0.7145    0.4125    0.0000 C   0  0  0  0  0  0  0  0  0  0  0  0
    0.0000    0.8250    0.0000 C   0  0  0  0  0  0  0  0  0  0  0  0
    1.4289    0.8250    0.0000 C   0  0  0  0  0  0  0  0  0  0  0  0
    2.1434    0.4125    0.0000 H   0  0  0  0  0  0  0  0  0  0  0  0
    1.4289    1.6500    0.0000 O   0  0  0  0  0  0  0  0  0  0  0  0
    1.4289   -0.8250    0.0000 C   0  0  0  0  0  0  0  0  0  0  0  0
    2.1434   -0.4125    0.0000 H   0  0  0  0  0  0  0  0  0  0  0  0
    1.4289   -1.6500    0.0000 O   0  0  0  0  0  0  0  0  0  0  0  0
   -1.4289    0.8250    0.0000 C   0  0  0  0  0  0  0  0  0  0  0  0
   -2.1434    0.4125    0.0000 C   0  0  0  0  0  0  0  0  0  0  0  0
   -2.1434   -0.4125    0.0000 C   0  0  0  0  0  0  0  0  0  0  0  0
   -1.4289   -0.8250    0.0000 C   0  0  0  0  0  0  0  0  0  0  0  0
  1  2  2  0      
  2  3  1  0      
  3  4  2  0      
  4  5  1  0      
  5  6  2  0      
  6  1  1  0      
  5  7  1  0      
  7  8  1  0      
  7  9  2  0      
  4 10  1  0      
 10 11  1  0      
 10 12  2  0      
  1 13  1  0      
 13 14  2  0      
 14 15  1  0      
 15 16  2  0      
 16  2  1  0      
M  END
