# Supplementary material for: A proteome-wide atlas of lysine-reactive chemistry
Source: Springer Nature journal article supplement (doi:10.1038/s41557-021-00765-4), 2021-09-09
Supplement: 41557_2021_765_MOESM283_ESM.mol [file 41557_2021_765_MOESM283_ESM.mol]

nchem.20092149B-comp28f.mol
  ChemDraw07012115412D

 39 41  0  0  0  0  0  0  0  0999 V2000
   -0.0396    2.5826    0.0000 C   0  0  0  0  0  0  0  0  0  0  0  0
    0.6749    2.1701    0.0000 C   0  0  0  0  0  0  0  0  0  0  0  0
    0.6749    1.3451    0.0000 C   0  0  0  0  0  0  0  0  0  0  0  0
   -0.0396    0.9326    0.0000 C   0  0  0  0  0  0  0  0  0  0  0  0
   -0.7540    1.3451    0.0000 C   0  0  0  0  0  0  0  0  0  0  0  0
   -0.7540    2.1701    0.0000 C   0  0  0  0  0  0  0  0  0  0  0  0
   -0.0396    3.4076    0.0000 O   0  0  0  0  0  0  0  0  0  0  0  0
   -1.4685    0.9326    0.0000 O   0  0  0  0  0  0  0  0  0  0  0  0
    1.3894    0.9326    0.0000 O   0  0  0  0  0  0  0  0  0  0  0  0
   -1.4685    2.5826    0.0000 C   0  0  0  0  0  0  0  0  0  0  0  0
    1.3894    2.5826    0.0000 C   0  0  0  0  0  0  0  0  0  0  0  0
    1.3894    3.4076    0.0000 O   0  0  0  0  0  0  0  0  0  0  0  0
    2.1039    2.1701    0.0000 H   0  0  0  0  0  0  0  0  0  0  0  0
   -1.4685    3.4076    0.0000 O   0  0  0  0  0  0  0  0  0  0  0  0
   -2.1830    2.1701    0.0000 H   0  0  0  0  0  0  0  0  0  0  0  0
   -0.0396   -0.4640    0.0000 C   0  0  0  0  0  0  0  0  0  0  0  0
   -0.7540   -0.8765    0.0000 C   0  0  0  0  0  0  0  0  0  0  0  0
    2.1879   -1.7576    0.0000 C   0  0  0  0  0  0  0  0  0  0  0  0
    1.4735   -2.1701    0.0000 C   0  0  0  0  0  0  0  0  0  0  0  0
    0.7590   -1.7576    0.0000 C   0  0  0  0  0  0  0  0  0  0  0  0
    0.7590   -0.9326    0.0000 C   0  0  0  0  0  0  0  0  0  0  0  0
    1.4735   -0.5201    0.0000 C   0  0  0  0  0  0  0  0  0  0  0  0
    2.1879   -0.9326    0.0000 C   0  0  0  0  0  0  0  0  0  0  0  0
    2.9024   -2.1701    0.0000 O   0  0  0  0  0  0  0  0  0  0  0  0
    1.4735    0.3049    0.0000 O   0  0  0  0  0  0  0  0  0  0  0  0
    0.0445   -2.1701    0.0000 O   0  0  0  0  0  0  0  0  0  0  0  0
    2.9024   -0.5201    0.0000 C   0  0  0  0  0  0  0  0  0  0  0  0
    1.4735   -2.9951    0.0000 C   0  0  0  0  0  0  0  0  0  0  0  0
    0.7590   -3.4076    0.0000 O   0  0  0  0  0  0  0  0  0  0  0  0
    2.1879   -3.4076    0.0000 H   0  0  0  0  0  0  0  0  0  0  0  0
    2.9024    0.3049    0.0000 O   0  0  0  0  0  0  0  0  0  0  0  0
    3.6169   -0.9326    0.0000 H   0  0  0  0  0  0  0  0  0  0  0  0
   -1.4685   -0.4640    0.0000 C   0  0  0  0  0  0  0  0  0  0  0  0
   -2.1830   -0.8765    0.0000 C   0  0  0  0  0  0  0  0  0  0  0  0
   -2.8999   -0.4626    0.0000 C   0  0  0  0  0  0  0  0  0  0  0  0
   -3.6169   -0.8765    0.0000 C   0  0  0  0  0  0  0  0  0  0  0  0
   -3.6169   -1.7044    0.0000 C   0  0  0  0  0  0  0  0  0  0  0  0
   -2.8999   -2.1183    0.0000 C   0  0  0  0  0  0  0  0  0  0  0  0
   -2.1830   -1.7044    0.0000 C   0  0  0  0  0  0  0  0  0  0  0  0
  1  2  2  0      
  2  3  1  0      
  3  4  2  0      
  4  5  1  0      
  5  6  2  0      
  6  1  1  0      
  1  7  1  0      
  5  8  1  0      
  3  9  1  0      
  6 10  1  0      
  2 11  1  0      
 11 12  2  0      
 11 13  1  0      
 10 14  2  0      
 10 15  1  0      
  4 16  1  0      
 16 17  1  0      
 18 19  2  0      
 19 20  1  0      
 20 21  2  0      
 21 22  1  0      
 22 23  2  0      
 23 18  1  0      
 18 24  1  0      
 22 25  1  0      
 20 26  1  0      
 23 27  1  0      
 19 28  1  0      
 28 29  2  0      
 28 30  1  0      
 27 31  2  0      
 27 32  1  0      
 16 21  1  0      
 17 33  1  0      
 33 34  1  0      
 34 35  2  0      
 35 36  1  0      
 36 37  2  0      
 37 38  1  0      
 38 39  2  0      
 39 34  1  0      
M  END
