# Supplementary material for: A proteome-wide atlas of lysine-reactive chemistry
Source: Springer Nature journal article supplement (doi:10.1038/s41557-021-00765-4), 2021-09-09
Supplement: 41557_2021_765_MOESM357_ESM.mol [file 41557_2021_765_MOESM357_ESM.mol]

nchem.20092149B-comp33f.mol
  ChemDraw07012115422D

 30 32  0  0  1  0  0  0  0  0999 V2000
   -0.8061    0.1477    0.0000 C   0  0  0  0  0  0  0  0  0  0  0  0
    0.0189    0.1420    0.0000 C   0  0  0  0  0  0  0  0  0  0  0  0
    0.0246    0.9670    0.0000 C   0  0  0  0  0  0  0  0  0  0  0  0
   -0.8004    0.9727    0.0000 C   0  0  0  0  0  0  0  0  0  0  0  0
   -1.3797    1.5600    0.0000 O   0  0  0  0  0  0  0  0  0  0  0  0
    0.6119    1.5463    0.0000 O   0  0  0  0  0  0  0  0  0  0  0  0
   -1.3934   -0.4316    0.0000 N   0  0  0  0  0  0  0  0  0  0  0  0
    0.5982   -0.4453    0.0000 N   0  0  0  0  0  0  0  0  0  0  0  0
    1.3966   -0.2373    0.0000 C   0  0  0  0  0  0  0  0  0  0  0  0
    1.9759   -0.8247    0.0000 C   0  0  0  0  0  0  0  0  0  0  0  0
    2.7742   -0.6166    0.0000 C   0  0  0  0  0  0  0  0  0  0  0  0
    2.9933    0.1788    0.0000 C   0  0  0  0  0  0  0  0  0  0  0  0
    2.4139    0.7661    0.0000 C   0  0  0  0  0  0  0  0  0  0  0  0
    1.6156    0.5581    0.0000 C   0  0  0  0  0  0  0  0  0  0  0  0
   -2.1888   -0.2126    0.0000 C   0  0  0  0  0  0  0  0  0  0  0  0
   -2.3969    0.5857    0.0000 C   0  0  0  0  0  0  0  0  0  0  0  0
   -2.7762   -0.7920    0.0000 C   0  0  0  0  0  0  0  0  0  0  0  0
   -3.5716   -0.5730    0.0000 C   0  0  0  0  0  0  0  0  0  0  0  0
   -4.1590   -1.1523    0.0000 C   0  0  0  0  0  0  0  0  0  0  0  0
   -3.9509   -1.9506    0.0000 C   0  0  0  0  0  0  0  0  0  0  0  0
   -3.1555   -2.1696    0.0000 C   0  0  0  0  0  0  0  0  0  0  0  0
   -2.5682   -1.5903    0.0000 C   0  0  0  0  0  0  0  0  0  0  0  0
    2.6329    1.5615    0.0000 C   0  0  0  0  0  0  0  0  0  0  0  0
    3.1904    0.9534    0.0000 F   0  0  0  0  0  0  0  0  0  0  0  0
    3.2410    2.1190    0.0000 F   0  0  0  0  0  0  0  0  0  0  0  0
    2.0754    2.1696    0.0000 F   0  0  0  0  0  0  0  0  0  0  0  0
    3.3536   -1.2040    0.0000 C   0  0  0  0  0  0  0  0  0  0  0  0
    2.5482   -1.3828    0.0000 F   0  0  0  0  0  0  0  0  0  0  0  0
    3.5323   -2.0094    0.0000 F   0  0  0  0  0  0  0  0  0  0  0  0
    4.1590   -1.0252    0.0000 F   0  0  0  0  0  0  0  0  0  0  0  0
 23 24  1  0      
 23 25  1  0      
 23 26  1  0      
 13 23  1  0      
 27 28  1  0      
 27 29  1  0      
 27 30  1  0      
 11 27  1  0      
  1  2  2  0      
  2  3  1  0      
  3  4  1  0      
  4  1  1  0      
  4  5  2  0      
  3  6  2  0      
  1  7  1  0      
  2  8  1  0      
  8  9  1  0      
  9 10  2  0      
 10 11  1  0      
 11 12  2  0      
 12 13  1  0      
 13 14  2  0      
 14  9  1  0      
 15  7  1  1      
 15 16  1  0      
 15 17  1  0      
 17 18  2  0      
 18 19  1  0      
 19 20  2  0      
 20 21  1  0      
 21 22  2  0      
 22 17  1  0      
M  STY  1   1 SUP
M  SLB  1   1   1
M  SAL   1  4  23  24  25  26
M  SBL   1  1   4
M  SMT   1 CF3
M  SBV   1   4   -0.2190   -0.7954
M  STY  1   2 SUP
M  SLB  1   2   2
M  SAL   2  4  27  28  29  30
M  SBL   2  1   8
M  SMT   2 CF3
M  SBV   2   8   -0.5793    0.5874
M  END
